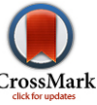

## Correction

# Correction: Low Levels of Peripheral CD161<sup>++</sup>CD8<sup>+</sup> Mucosal Associated Invariant T (MAIT) Cells Are Found in HIV and HIV/TB Co-Infection

The *PLOS ONE* Staff

## Notice of Republication

This article was republished on March 21, 2014, to replace an incorrectly published version. The publisher apologizes for the error. Please download this article again to view the correct version. The originally published, uncorrected article and the republished, corrected article are provided here for reference.

## Supporting Information

**File S1.** Originally published, uncorrected article.

**File S2.** Republished, corrected article.

## Reference

1. Wong EB, Akilimali NA, Govender P, Sullivan ZA, Cosgrove C, et al. (2013) Low Levels of Peripheral CD161<sup>++</sup>CD8<sup>+</sup> Mucosal Associated Invariant T (MAIT) Cells Are Found in HIV and HIV/TB Co-Infection. *PLoS ONE* 8(12): e83474. doi:10.1371/journal.pone.0083474

**Citation:** The *PLOS ONE* Staff (2014) Correction: Low Levels of Peripheral CD161<sup>++</sup>CD8<sup>+</sup> Mucosal Associated Invariant T (MAIT) Cells Are Found in HIV and HIV/TB Co-Infection. *PLoS ONE* 9(4): e95115. doi:10.1371/journal.pone.0095115

**Published** April 8, 2014

**Copyright:** © 2014 The *PLOS ONE* Staff. This is an open-access article distributed under the terms of the Creative Commons Attribution License, which permits unrestricted use, distribution, and reproduction in any medium, provided the original author and source are credited.
